# Supplementary material
Source: Springer Nature journal article supplement (https://www.springermedizin.de/resource/supplementary/12967_2011_709_MOESM11_ESM.pdf/9577320)

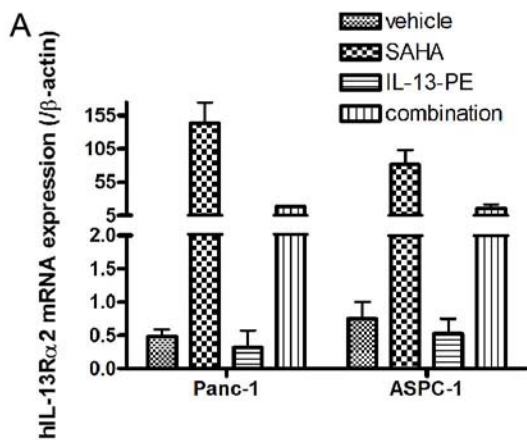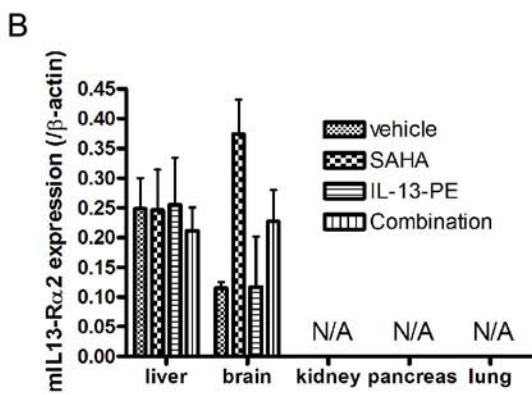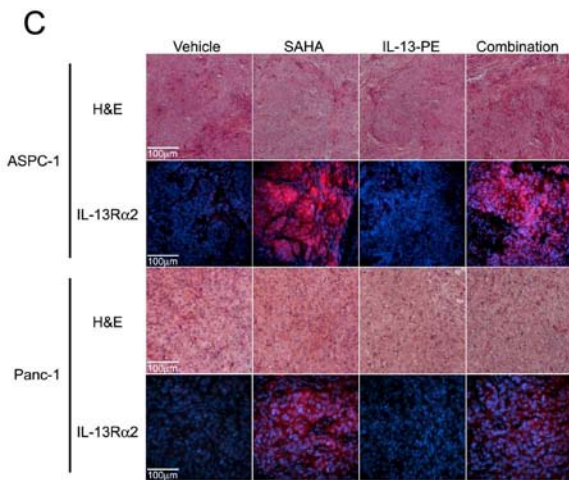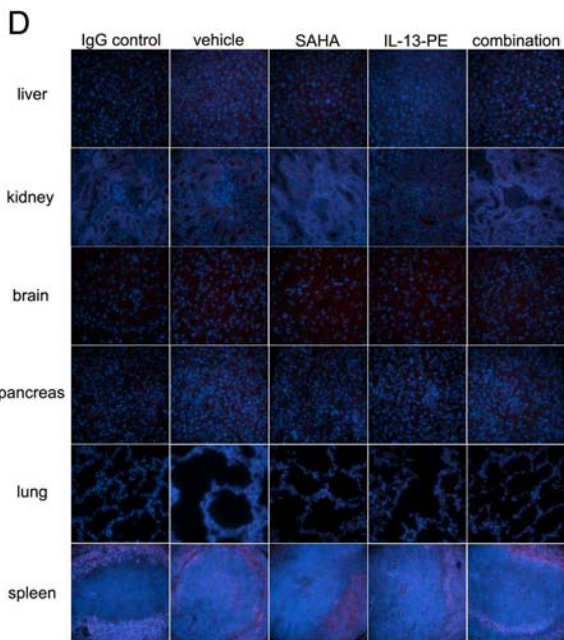

Supplement: MOESM11 [file 9577320]
